# Supplementary material for: Crossbred Sows Fed a Western Diet during Pre-Gestation, Gestation, Lactation, and Post-Lactation Periods Develop Signs of Lean Metabolic Syndrome That Are Partially Attenuated by Spirulina Supplementation
Source: MDPI journal article supplement (doi:10.3390/nu14173574), 2022-08-30
Supplement: s1 [file s1]

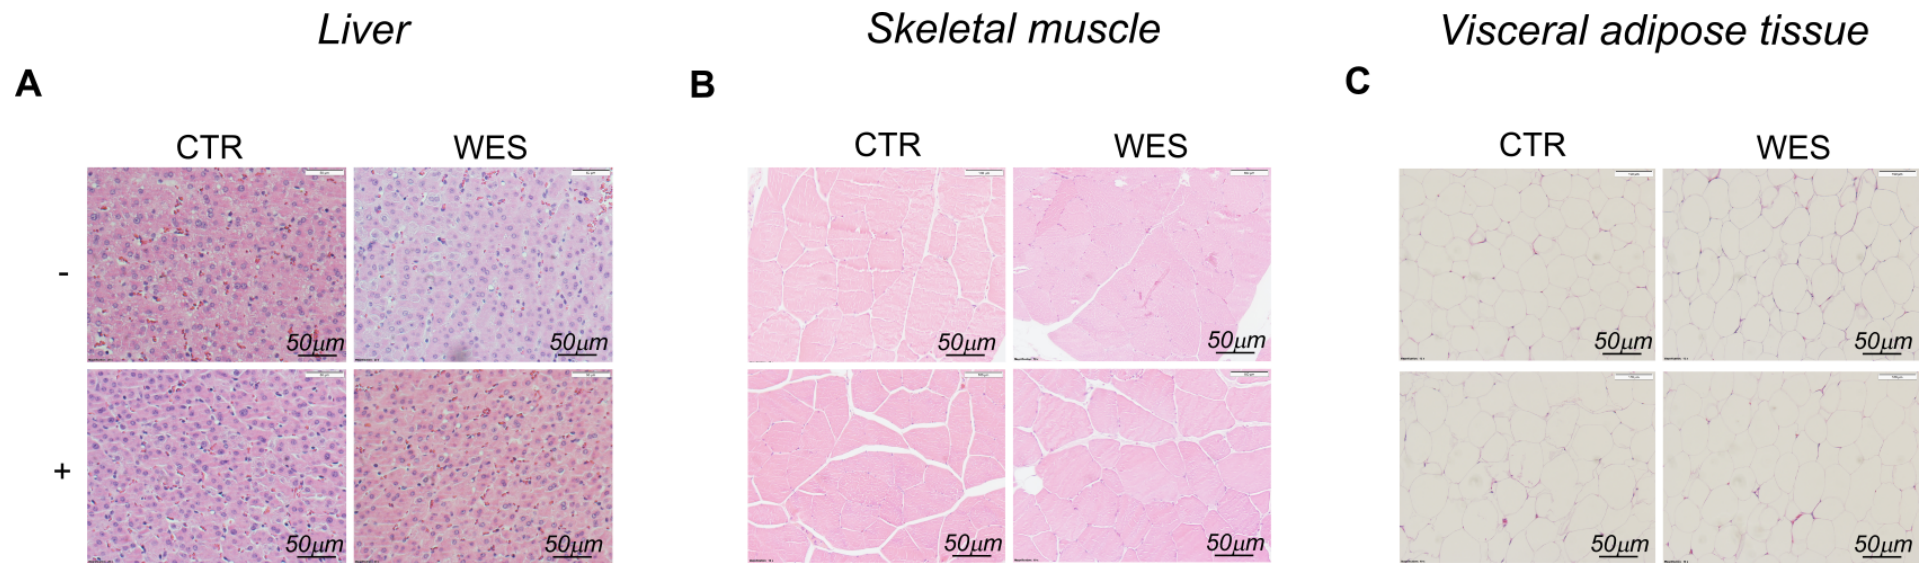

**SUPPLEMENTARY FIGURE S1.** Morphology of liver, skeletal muscle and visceral adipose tissue (VAT) collected at slaughter. Representative images of A) liver, B) skeletal muscle and C) VAT histology.

CTR: Control diet; WES: Western diet; -: non-supplemented; +: spirulina-supplemented.

**SUPPLEMENTARY TABLE S1.**

Effects of Western diet and spirulina supplementation on the FA composition of liver and skeletal muscle of sows (g/100g total FA)<sup>§</sup>.

| Diet (D)<br>Spirulina (Sp) |               | CTR               |                   | WES               |                   | SEM   | Significance |             |             |
|----------------------------|---------------|-------------------|-------------------|-------------------|-------------------|-------|--------------|-------------|-------------|
|                            |               | –                 | +                 | –                 | +                 |       | D            | Sp          | D×Sp        |
|                            | <i>Tissue</i> |                   |                   |                   |                   |       |              |             |             |
| C14:0                      | Liver         | 0.41              | 0.27              | 0.29              | 0.44              | 0.138 | <i>n.s.</i>  | <i>n.s.</i> | #           |
|                            | Muscle        | 1.26              | 1.26              | 1.30              | 1.24              | 0.050 | <i>n.s.</i>  | <i>n.s.</i> | <i>n.s.</i> |
| C16:0                      | Liver         | 14.8              | 14.9              | 14.4              | 15.2              | 0.95  | <i>n.s.</i>  | <i>n.s.</i> | <i>n.s.</i> |
|                            | Muscle        | 24.6              | 24.0              | 24.3              | 24.3              | 0.59  | <i>n.s.</i>  | <i>n.s.</i> | <i>n.s.</i> |
| <i>iso</i> C16:0           | Liver         | 0.39              | 0.29              | 0.31              | 0.47              | 0.114 | <i>n.s.</i>  | <i>n.s.</i> | #           |
|                            | Muscle        | 0.38              | 0.37              | 0.41              | 0.39              | 0.022 | <i>n.s.</i>  | <i>n.s.</i> | <i>n.s.</i> |
| C16:1 <i>n</i> –7          | Liver         | 0.78              | 0.62              | 0.79              | 0.95              | 0.270 | <i>n.s.</i>  | <i>n.s.</i> | <i>n.s.</i> |
|                            | Muscle        | 2.67              | 2.75              | 2.69              | 2.83              | 0.256 | <i>n.s.</i>  | <i>n.s.</i> | <i>n.s.</i> |
| C17:0                      | Liver         | 0.54              | 0.45              | 0.54              | 0.23              | 0.096 | <i>n.s.</i>  | *           | <i>n.s.</i> |
|                            | Muscle        | 0.14 <sup>a</sup> | 0.14 <sup>a</sup> | 0.17 <sup>b</sup> | 0.13 <sup>a</sup> | 0.008 | *            | *           | **          |
| C18:0                      | Liver         | 25.1              | 25.1              | 27.4              | 26.3              | 1.61  | <i>n.s.</i>  | <i>n.s.</i> | <i>n.s.</i> |
|                            | Muscle        | 14.6              | 13.8              | 16.1              | 14.3              | 0.66  | *            | **          | <i>n.s.</i> |
| C18:1 <i>cis</i> –9        | Liver         | 15.4              | 14.1              | 15.0              | 18.1              | 2.77  | <i>n.s.</i>  | <i>n.s.</i> | <i>n.s.</i> |
|                            | Muscle        | 39.1              | 39.4              | 37.6              | 40.0              | 1.84  | <i>n.s.</i>  | <i>n.s.</i> | <i>n.s.</i> |
| C18:1 <i>cis</i> –11       | Liver         | n.a.              | n.a.              | n.a.              | n.a.              | n.a.  | <i>n.a.</i>  | <i>n.a.</i> | <i>n.a.</i> |
|                            | Muscle        | 3.43              | 3.72              | 3.14              | 3.47              | 0.203 | #            | #           | <i>n.s.</i> |
| C18:2 <i>n</i> –6 (LA)     | Liver         | 15.8              | 15.2              | 13.3              | 12.4              | 0.86  | ***          | <i>n.s.</i> | <i>n.s.</i> |
|                            | Muscle        | 9.76              | 9.84              | 9.46              | 7.75              | 1.620 | #            | <i>n.s.</i> | <i>n.s.</i> |
| C18:3 <i>n</i> –6 (GLA)    | Liver         | 0.26              | 0.34              | 0.24              | 0.36              | 0.059 | <i>n.s.</i>  | #           | <i>n.s.</i> |
|                            | Muscle        | 0.04              | 0.04              | 0.05              | 0.05              | 0.008 | <i>n.s.</i>  | <i>n.s.</i> | <i>n.s.</i> |
| C18:3 <i>n</i> –3 (ALA)    | Liver         | 0.16              | 0.14              | 0.16              | 0.21              | 0.099 | <i>n.s.</i>  | <i>n.s.</i> | <i>n.s.</i> |
|                            | Muscle        | 0.21              | 0.26              | 0.28              | 0.23              | 0.008 | <i>n.s.</i>  | <i>n.s.</i> | *           |
| C20:0                      | Liver         | 0.18              | 0.17              | 0.12              | 0.10              | 0.068 | *            | <i>n.s.</i> | <i>n.s.</i> |
|                            | Muscle        | 0.39              | 0.32              | 0.30              | 0.30              | 0.082 | #            | #           | <i>n.s.</i> |
| C20:1 <i>n</i> –9          | Liver         | 0.32              | 0.33              | 0.26              | 0.25              | 0.023 | ***          | <i>n.s.</i> | <i>n.s.</i> |
|                            | Muscle        | 0.83              | 0.84              | 0.71              | 0.75              | 0.067 | **           | <i>n.s.</i> | <i>n.s.</i> |
| C20:2 <i>n</i> –6          | Liver         | 0.45              | 0.45              | 0.24              | 0.20              | 0.047 | ***          | <i>n.s.</i> | <i>n.s.</i> |
|                            | Muscle        | 0.36              | 0.36              | 0.23              | 0.22              | 0.028 | ***          | <i>n.s.</i> | <i>n.s.</i> |
| C20:3 <i>n</i> –6 (DGLA)   | Liver         | 0.55              | 0.51              | 0.71              | 0.53              | 0.106 | *            | *           | <i>n.s.</i> |
|                            | Muscle        | 0.15              | 0.17              | 0.18              | 0.15              | 0.038 | <i>n.s.</i>  | <i>n.s.</i> | <i>n.s.</i> |
| C20:4 <i>n</i> –6          | Liver         | 17.5              | 19.2              | 18.3              | 17.5              | 1.67  | <i>n.s.</i>  | <i>n.s.</i> | <i>n.s.</i> |
|                            | Muscle        | 1.27              | 1.47              | 2.23              | 1.60              | 0.681 | <i>n.s.</i>  | <i>n.s.</i> | <i>n.s.</i> |
| C20:5 <i>n</i> –3 (EPA)    | Liver         | 0.26              | 0.22              | 0.51              | 0.43              | 0.048 | ***          | <i>n.s.</i> | <i>n.s.</i> |
|                            | Muscle        | 0.11              | 0.11              | 0.16              | 0.12              | 0.098 | <i>n.s.</i>  | <i>n.s.</i> | <i>n.s.</i> |
| C22:4 <i>n</i> –6          | Liver         | 1.27              | 1.43              | 0.97              | 0.83              | 0.115 | ***          | <i>n.s.</i> | <i>n.s.</i> |
|                            | Muscle        | 0.08              | 0.12              | 0.10              | 0.08              | 0.068 | <i>n.s.</i>  | <i>n.s.</i> | <i>n.s.</i> |
| C22:5 <i>n</i> –3          | Liver         | 1.59              | 1.82              | 1.70              | 1.38              | 0.223 | <i>n.s.</i>  | <i>n.s.</i> | <i>n.s.</i> |
|                            | Muscle        | 0.14              | 0.15              | 0.21              | 0.16              | 0.055 | <i>n.s.</i>  | <i>n.s.</i> | <i>n.s.</i> |
| C22:6 <i>n</i> –3          | Liver         | 1.47              | 1.36              | 1.45              | 1.45              | 0.394 | <i>n.s.</i>  | <i>n.s.</i> | <i>n.s.</i> |
|                            | Muscle        | 0.04              | 0.04              | 0.07              | 0.06              | 0.021 | #            | <i>n.s.</i> | <i>n.s.</i> |
| C22:5 <i>n</i> –6          | Liver         | 0.38              | 0.28              | 0.32              | 0.21              | 0.130 | <i>n.s.</i>  | #           | <i>n.s.</i> |
|                            | Muscle        | n.a.              | n.a.              | n.a.              | n.a.              | n.a.  | <i>n.a.</i>  | <i>n.a.</i> | <i>n.a.</i> |

CTR: Control diet; WES: Western diet; n.a.: not analysed.

Data are presented as least square mean ± standard error of the mean (SEM). Within a row, least squares means without a common superscript differ ( $p < 0.05$ ). Statistical significances were set at \* $p < 0.05$ , \*\* $p < 0.01$ , \*\*\* $p < 0.001$ . Trends were defined as #.05 <  $p < 0.10$ . *n.s.*: not significant.

<sup>§</sup>Only fatty acids (FA) with a proportion > 0.2 g/100 g total FA in at least one of the groups or tissues are displayed.
